# Supplementary material
Source: PubMed Central journal article supplement (PMC2709401)

presence of lactacystin (5  $\mu$ M) or vehicle control for the indicated time points. Shown is the percentage of Trypan blue-positive cells in each culture, normalized to untreated cultures, from three independent experiments, \* $p$ <0.01, (ANOVA with Scheffé post-hoc tests) compared to vehicle-treated cultures.

#### **SUPPLEMENTAL FIGURES:**

**SUPPLEMENTAL FIGURE 1:** PC12 cells were loaded with the fluorescence probe, 7-dichlorodihydrofluorescein diacetate (10  $\mu$ M DCF-DA, Molecular Probes). Fluorescence images were acquired using a confocal microscope and quantified (**20**). Values are the average DCF fluorescence pixel intensity per cell before and after exposure to 0.5 mM MPP<sup>+</sup> at the indicated time periods. Values are mean  $\pm$  S.D. of determinations made in four to five cultures; 30–40 cells assessed in each culture, \* $p$ <0.01, # $p$ <0.05 (ANOVA with Scheffé post-hoc tests), compared to untreated cultures.

**SUPPLEMENTAL FIGURE 2:** The indicated PC12 clones were transfected with siRNA-CHOP or siRNA-Con (100 nM). One day after transfection, PC12 cells were exposed to 0.5 mM MPP<sup>+</sup> for the indicated time points and fixed for quantitation of cell death. Results were expressed as percentage of Trypan blue-positive cells in each culture, normalized to untreated cultures. Values represent mean  $\pm$  SD of determinations made in four separate cultures, \* $p$ <0.01, # $p$ <0.05 (ANOVA with Scheffé post-hoc tests), compared to PC12-VT cultures.

**SUPPLEMENTAL FIGURE 3:** (A) YC4-ER co-localizes with the ER marker calnexin before and after exposure to MPP<sup>+</sup> (0.5 mM). PC12 cells were transfected YC4-ER, fixed and immunostained with the calnexin antibody. Fluorescence images were acquired using a confocal microscope. (B) Pericam-mt co-localizes with the vital dye MitoTracker red in PC12 cells before and after exposure to MPP<sup>+</sup> (0.5 mM). Pericam-mt -transfected PC12 cells were loaded with Mitotracker red and imaged using a confocal microscope.

**SUPPLEMENTAL FIGURE 4:** (A) Time course of Bcl-2 protein in total cell lysates (upper panels) and microsomes (lower panels) harvested from PC12-VT and PC12-Herp after incubation with 0.5 mM MPP<sup>+</sup>. Microsomal fractions were isolated by differential centrifugation as described previously (**16**). Equal protein loading was confirmed by reprobing the immunoblots for ERK1 and calnexin (an ER-resident protein), respectively. (B). Herp fails to interact with Bcl-2. A polyclonal mouse anti-Herp antibody was used for immunoprecipitation as described in Materials and Methods. The Bcl-2 protein is detected in the input (whole lysates) but not in the immune complexes bound to control IgG or Herp antibody. The heavy chain of IgG is indicated as IgG-h.

**SUPPLEMENTAL FIGURE 5:** PC12 cells were treated with 5  $\mu$ M lactacystin or vehicle control. At the indicated time points, chymotrypsin-like activity of the proteasome were assessed in whole cell lysates using the fluorogenic peptide Suc-Leu-Leu-Val-Tyr-7-amino-4-methylcoumarin (LLVY-AMC) according to the method reported previously (**15**). Values are the average fluorescence intensity (360/440 nM) before and after exposure to 0.5 mM MPP<sup>+</sup> at the indicated time points. Values are mean  $\pm$  S.D. of determinations made in four to five dishes, \* $p$ <0.01 (ANOVA with Scheffé post-hoc tests), compared to vehicle-treated cultures.

# SUPPL. FIGURE 1

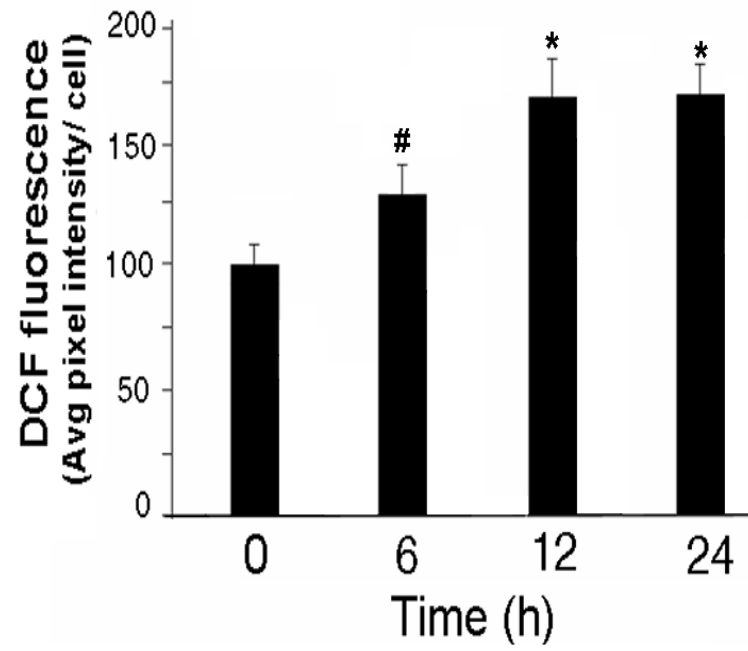

## SUPPL. FIGURE 2

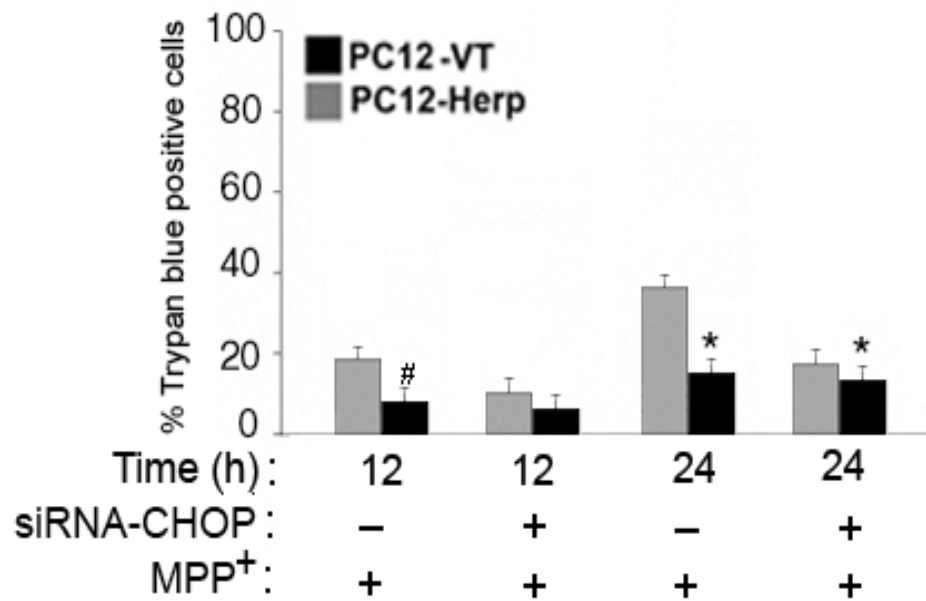

# SUPPL. FIGURE 3

## A

Control

24 h MPP<sup>+</sup>

Mitotracker Red/  
pericam-mt

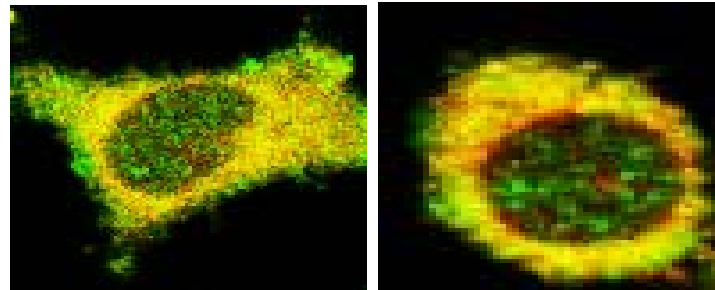

## B

Control

24 h MPP<sup>+</sup>

Calreticulin/  
YC4-ER

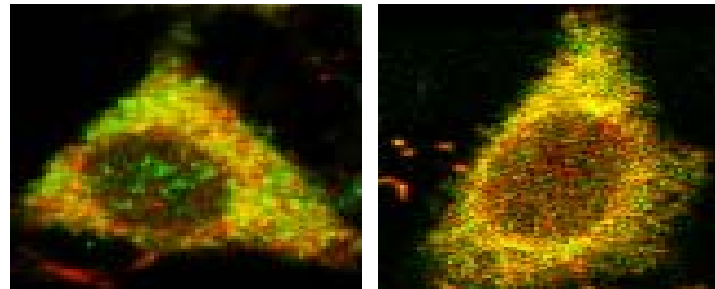

# SUPPL. FIGURE 4

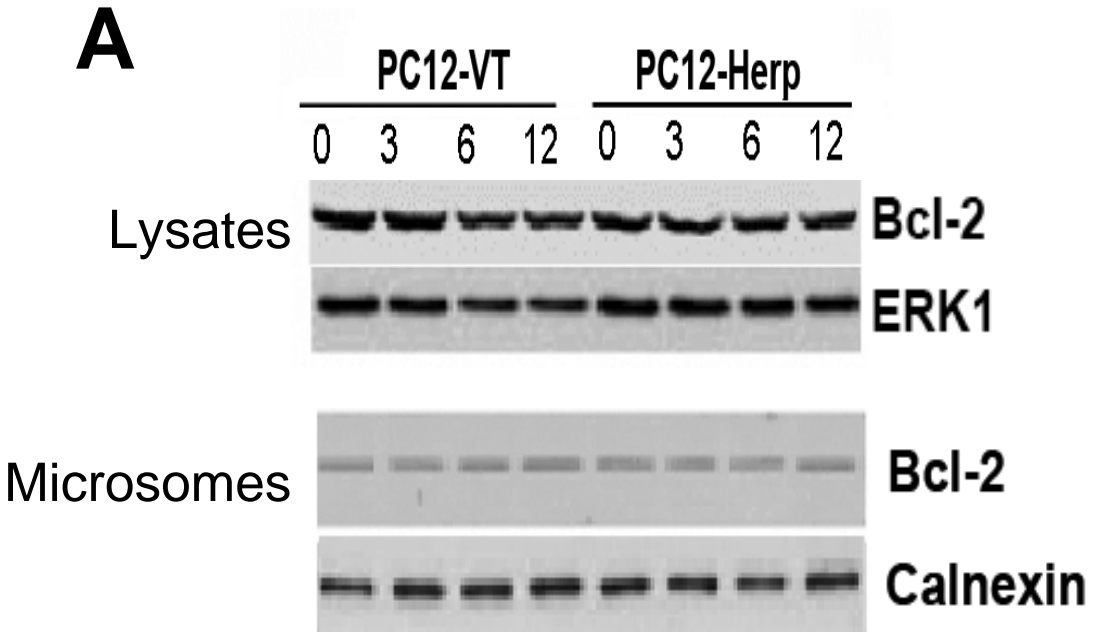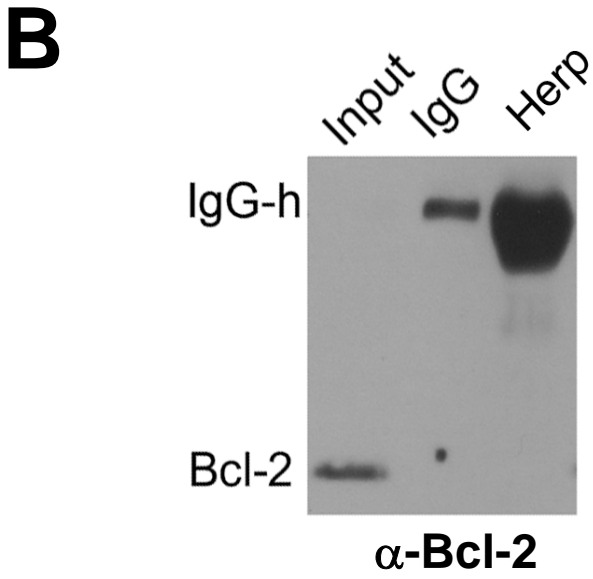

# SUPL. FIGURE 5

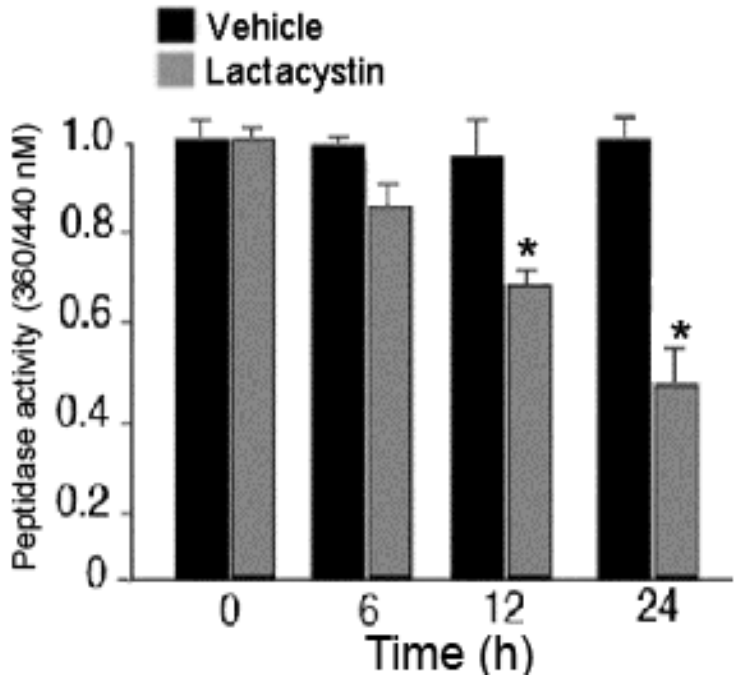

Supplement: supp_M109.020891_Suppdata.pdf [file supp_M109.020891_Suppdata.pdf]
